# Supplementary material
Source: PubMed Central journal article supplement (PMC7193045)
Supplement: mSphere.00316-20-st001.pdf [file mSphere.00316-20-st001.pdf]

| <b>Model: molecular clock-tree prior</b> | <b>SS</b> | <b><i>lnBF</i><sub>SS</sub></b> | <b>PS</b> | <b><i>lnBF</i><sub>PS</sub></b> |
|------------------------------------------|-----------|---------------------------------|-----------|---------------------------------|
| <b>SC-CONST</b>                          | -48841.9  |                                 | -48841.0  |                                 |
| <b>RC-CONST</b>                          | -48553.7  |                                 | -48552.5  |                                 |
| <b>SC-BSP</b>                            | -48841.0  |                                 | -48840.9  |                                 |
| <b>RC-BSP</b>                            | -48556.6  |                                 | -48556.7  |                                 |
| <b><i>SC-CONST vs RC-CONST</i></b>       |           | <i>288.2</i>                    |           | <i>288.4</i>                    |
| <b><i>SC-BSP vs RC-BSP</i></b>           |           | <i>284.4</i>                    |           | <i>284.2</i>                    |
| <b><i>RC-CONST vs RC-BSP</i></b>         |           | <i>-2.9</i>                     |           | <i>-4.2</i>                     |

Model comparison indicated in italics. Model: molecular clock and demographic priors combination; SC= Strict clock; RC= Uncorrelated relaxed clock; CONST= Constant size demographic prior; BSP= Bayesian Skyline demographic prior; SS= Stepping Stone; PS= Path Sampling; BF= Bayes Factor. Evidence against the null hypothesis ( $H_0$ ) was evaluated via MLE comparison with the more complex model ( $H_A$ ), referred to as the Bayes Factor (BF), wherein rising *lnBF* values indicate stronger evidence up to “10”.
