# Supplementary material
Source: PubMed Central journal article supplement (PMC7193045)
Supplement: mSphere.00316-20-st002.pdf [file mSphere.00316-20-st002.pdf]

| aa #            | Genome Sequence         | Codon (nuc. #)  | Amino Acid |
|-----------------|-------------------------|-----------------|------------|
| <b>Capsid</b>   |                         |                 |            |
| <b>#49</b>      | Manatee(MN192436)       | TTC (145-147)   | F          |
|                 | Haiti2014(KT276273.1)   | TTC (145-147)   | F          |
|                 | Haiti2014(KP140942.1)   | TTC (145-147)   | F          |
|                 | Haiti2015(MK514144.1)   | CTC (145-147)   | L          |
|                 | Haiti1994(JF262782.1)   | TTC (145-147)   | F          |
|                 | Senegal1981(MF004387.1) | TTC (145-147)   | F          |
| <b>#81</b>      | Manatee(MN192436)       | ACT (241-243)   | T          |
|                 | Haiti2014(KT276273.1)   | ACT (241-243)   | T          |
|                 | Haiti2014(KP140942.1)   | ACT (241-243)   | T          |
|                 | Haiti2015(MK514144.1)   | ATT (241-243)   | I          |
|                 | Haiti1994(JF262782.1)   | ATT (241-243)   | I          |
|                 | Senegal1981(MF004387.1) | ATT (241-243)   | I          |
| <b>Envelope</b> |                         |                 |            |
| <b>#317</b>     | Manatee(MN192436)       | AAA (949-951)   | K          |
|                 | Haiti2014(KT276273.1)   | AGA (949-951)   | R          |
|                 | Haiti2014(KP140942.1)   | AGA (949-951)   | R          |
|                 | Haiti2015(MK514144.1)   | AAA (949-951)   | K          |
|                 | Haiti1994(JF262782.1)   | AAA (949-951)   | K          |
|                 | Senegal1981(MF004387.1) | AAA (949-951)   | K          |
| <b>#343</b>     | Manatee(MN192436)       | TCA (1027-1029) | S          |
|                 | Haiti2014(KT276273.1)   | TCA (1027-1029) | S          |
|                 | Haiti2014(KP140942.1)   | TCA (1027-1029) | S          |
|                 | Haiti2015(MK514144.1)   | TCA (1027-1029) | L          |
|                 | Haiti1994(JF262782.1)   | TCA (1027-1029) | S          |
|                 | Senegal1981(MF004387.1) | TCA (1027-1029) | S          |
| <b>#360</b>     | Manatee(MN192436)       | TAT (1078-1080) | Y          |
|                 | Haiti2014(KT276273.1)   | TAT (1078-1080) | Y          |
|                 | Haiti2014(KP140942.1)   | TAT (1078-1080) | Y          |
|                 | Haiti2015(MK514144.1)   | TAT (1078-1080) | Y          |
|                 | Haiti1994(JF262782.1)   | TTT (1078-1080) | F          |
|                 | Senegal1981(MF004387.1) | TAT (1078-1080) | Y          |
| <b>#442</b>     | Manatee(MN192436)       | ACG (1324-1326) | T          |
|                 | Haiti2014(KT276273.1)   | ACG (1324-1326) | T          |
|                 | Haiti2014(KP140942.1)   | ACG (1324-1326) | T          |
|                 | Haiti2015(MK514144.1)   | ACG (1324-1326) | T          |
|                 | Haiti1994(JF262782.1)   | ACG (1324-1326) | T          |
|                 | Senegal1981(MF004387.1) | ATG (1324-1326) | M          |
| <b>#453</b>     | Manatee(MN192436)       | GAA (1357-1359) | E          |
|                 | Haiti2014(KT276273.1)   | GAA (1357-1359) | E          |
|                 | Haiti2014(KP140942.1)   | GAA (1357-1359) | E          |
|                 | Haiti2015(MK514144.1)   | AAA (1357-1359) | K          |
|                 | Haiti1994(JF262782.1)   | AAA (1357-1359) | K          |
|                 | Senegal1981(MF004387.1) | AAA (1357-1359) | K          |
| <b>#481</b>     | Manatee(MN192436)       | AAC (1441-1443) | N          |
|                 | Haiti2014(KT276273.1)   | AAC (1441-1443) | N          |
|                 | Haiti2014(KP140942.1)   | AAC (1441-1443) | N          |
|                 | Haiti2015(MK514144.1)   | AAA (1441-1443) | K          |
|                 | Haiti1994(JF262782.1)   | AAA (1441-1443) | K          |

|             |                         |                 |   |
|-------------|-------------------------|-----------------|---|
|             | Senegal1981(MF004387.1) | AAA (1441-1443) | K |
| <b>#501</b> | Manatee(MN192436)       | GCA (1501-1503) | A |
|             | Haiti2014(KT276273.1)   | GCA (1501-1503) | A |
|             | Haiti2014(KP140942.1)   | GCA (1501-1503) | A |
|             | Haiti2015(MK514144.1)   | ACA (1501-1503) | T |
|             | Haiti1994(JF262782.1)   | GCA (1501-1503) | A |
|             | Senegal1981(MF004387.1) | GCA (1501-1503) | A |
| <b>#512</b> | Manatee(MN192436)       | TAC (1534-1536) | Y |
|             | Haiti2014(KT276273.1)   | AAC (1534-1536) | N |
|             | Haiti2014(KP140942.1)   | AAC (1534-1536) | N |
|             | Haiti2015(MK514144.1)   | TAC (1534-1536) | Y |
|             | Haiti1994(JF262782.1)   | TAC (1534-1536) | Y |
|             | Senegal1981(MF004387.1) | TAC (1534-1536) | Y |
| <b>#627</b> | Manatee(MN192436)       | ATT (1879-1881) | A |
|             | Haiti2014(KT276273.1)   | ATT (1879-1881) | A |
|             | Haiti2014(KP140942.1)   | ATT (1879-1881) | A |
|             | Haiti2015(MK514144.1)   | GTT (1879-1881) | V |
|             | Haiti1994(JF262782.1)   | GTT (1879-1881) | V |
|             | Senegal1981(MF004387.1) | GTT (1879-1881) | V |
| <b>#630</b> | Manatee(MN192436)       | GTT (1888-1890) | V |
|             | Haiti2014(KT276273.1)   | GTT (1888-1890) | V |
|             | Haiti2014(KP140942.1)   | GTT (1888-1890) | V |
|             | Haiti2015(MK514144.1)   | GTT (1888-1890) | V |
|             | Haiti1994(JF262782.1)   | GTT (1888-1890) | V |
|             | Senegal1981(MF004387.1) | ATC (1888-1890) | I |
| <b>#633</b> | Manatee(MN192436)       | TCT (1897-1899) | S |
|             | Haiti2014(KT276273.1)   | TCT (1897-1899) | S |
|             | Haiti2014(KP140942.1)   | TCT (1897-1899) | S |
|             | Haiti2015(MK514144.1)   | GCC (1897-1899) | A |
|             | Haiti1994(JF262782.1)   | TCC (1897-1899) | S |
|             | Senegal1981(MF004387.1) | TCC (1897-1899) | S |
| <b>#634</b> | Manatee(MN192436)       | ATC (1900-1902) | I |
|             | Haiti2014(KT276273.1)   | ATC (1900-1902) | I |
|             | Haiti2014(KP140942.1)   | ATC (1900-1902) | I |
|             | Haiti2015(MK514144.1)   | ACC (1900-1902) | T |
|             | Haiti1994(JF262782.1)   | ACC (1900-1902) | T |
|             | Senegal1981(MF004387.1) | ACC (1900-1902) | T |
| <b>NS1</b>  |                         |                 |   |
| <b>#785</b> | Manatee(MN192436)       | AGA (2353-2355) | R |
|             | Haiti2014(KT276273.1)   | AGA (2353-2355) | R |
|             | Haiti2014(KP140942.1)   | AGA (2353-2355) | R |
|             | Haiti2015(MK514144.1)   | AGA (2353-2355) | R |
|             | Haiti1994(JF262782.1)   | AGA (2353-2355) | R |
|             | Senegal1981(MF004387.1) | AAA (2353-2355) | K |
| <b>#796</b> | Manatee(MN192436)       | ATT (2386-2388) | I |
|             | Haiti2014(KT276273.1)   | ATT (2386-2388) | I |
|             | Haiti2014(KP140942.1)   | ATT (2386-2388) | I |
|             | Haiti2015(MK514144.1)   | GTT (2386-2388) | V |
|             | Haiti1994(JF262782.1)   | GTT (2386-2388) | V |
|             | Senegal1981(MF004387.1) | GTT (2386-2388) | V |
| <b>#877</b> | Manatee(MN192436)       | GCA (2629-2631) | A |

|              |                         |                 |   |
|--------------|-------------------------|-----------------|---|
|              | Haiti2014(KT276273.1)   | GCA (2629-2631) | A |
|              | Haiti2014(KP140942.1)   | GCA (2629-2631) | A |
|              | Haiti2015(MK514144.1)   | GCA (2629-2631) | A |
|              | Haiti1994(JF262782.1)   | ACA (2629-2631) | T |
|              | Senegal1981(MF004387.1) | GCA (2629-2631) | A |
| <b>#882</b>  | Manatee(MN192436)       | GCA (2644-2646) | A |
|              | Haiti2014(KT276273.1)   | GCA (2644-2646) | A |
|              | Haiti2014(KP140942.1)   | GCA (2644-2646) | A |
|              | Haiti2015(MK514144.1)   | GCG (2644-2646) | A |
|              | Haiti1994(JF262782.1)   | GTG (2644-2646) | V |
|              | Senegal1981(MF004387.1) | GTG (2644-2646) | V |
| <b>#927</b>  | Manatee(MN192436)       | CTT (2779-2781) | L |
|              | Haiti2014(KT276273.1)   | CTT (2779-2781) | L |
|              | Haiti2014(KP140942.1)   | CTT (2779-2781) | L |
|              | Haiti2015(MK514144.1)   | TTT (2779-2781) | F |
|              | Haiti1994(JF262782.1)   | CTT (2779-2781) | L |
|              | Senegal1981(MF004387.1) | CTT (2779-2781) | L |
| <b>#952</b>  | Manatee(MN192436)       | GTG (2854-2856) | V |
|              | Haiti2014(KT276273.1)   | ATG (2854-2856) | M |
|              | Haiti2014(KP140942.1)   | ATG (2854-2856) | M |
|              | Haiti2015(MK514144.1)   | GTG (2854-2856) | V |
|              | Haiti1994(JF262782.1)   | GTG (2854-2856) | V |
|              | Senegal1981(MF004387.1) | GTG (2854-2856) | V |
| <b>#988</b>  | Manatee(MN192436)       | AAA (2962-2964) | K |
|              | Haiti2014(KT276273.1)   | AAA (2962-2964) | K |
|              | Haiti2014(KP140942.1)   | AAA (2962-2964) | K |
|              | Haiti2015(MK514144.1)   | AGA (2962-2964) | R |
|              | Haiti1994(JF262782.1)   | AAA (2962-2964) | K |
|              | Senegal1981(MF004387.1) | AAA (2962-2964) | K |
| <b>#998</b>  | Manatee(MN192436)       | CTA (2992-2994) | L |
|              | Haiti2014(KT276273.1)   | CTA (2992-2994) | L |
|              | Haiti2014(KP140942.1)   | CTA (2992-2994) | L |
|              | Haiti2015(MK514144.1)   | CTG (2992-2994) | L |
|              | Haiti1994(JF262782.1)   | CAG (2992-2994) | Q |
|              | Senegal1981(MF004387.1) | CTG (2992-2994) | L |
| <b>#1038</b> | Manatee(MN192436)       | ACC (3112-3114) | T |
|              | Haiti2014(KT276273.1)   | ATC (3112-3114) | I |
|              | Haiti2014(KP140942.1)   | ATC (3112-3114) | I |
|              | Haiti2015(MK514144.1)   | ACC (3112-3114) | T |
|              | Haiti1994(JF262782.1)   | ACC (3112-3114) | T |
|              | Senegal1981(MF004387.1) | ACC (3112-3114) | T |
| <b>#1039</b> | Manatee(MN192436)       | GCA (3115-3117) | A |
|              | Haiti2014(KT276273.1)   | GCA (3115-3117) | A |
|              | Haiti2014(KP140942.1)   | GCA (3115-3117) | A |
|              | Haiti2015(MK514144.1)   | GTG (3115-3117) | V |
|              | Haiti1994(JF262782.1)   | ATG (3115-3117) | M |
|              | Senegal1981(MF004387.1) | GTG (3115-3117) | V |
| <b>#1064</b> | Manatee(MN192436)       | GAT (3190-3192) | D |
|              | Haiti2014(KT276273.1)   | GAT (3190-3192) | D |
|              | Haiti2014(KP140942.1)   | GAT (3190-3192) | D |
|              | Haiti2015(MK514144.1)   | AAT (3190-3192) | N |

|              |                         |                 |   |
|--------------|-------------------------|-----------------|---|
|              | Haiti1994(JF262782.1)   | GAT (3190-3192) | D |
|              | Senegal1981(MF004387.1) | GAT (3190-3192) | D |
| <b>#1125</b> | Manatee(MN192436)       | GCG (3373-3375) | A |
|              | Haiti2014(KT276273.1)   | GCG (3373-3375) | A |
|              | Haiti2014(KP140942.1)   | GCG (3373-3375) | A |
|              | Haiti2015(MK514144.1)   | ACG (3373-3375) | T |
|              | Haiti1994(JF262782.1)   | ACG (3373-3375) | T |
|              | Senegal1981(MF004387.1) | ACG (3373-3375) | T |
| <b>NS2A</b>  |                         |                 |   |
| <b>#1161</b> | Manatee(MN192436)       | GCT (3481-3483) | A |
|              | Haiti2014(KT276273.1)   | GTT (3481-3483) | V |
|              | Haiti2014(KP140942.1)   | GCT (3481-3483) | A |
|              | Haiti2015(MK514144.1)   | GCT (3481-3483) | A |
|              | Haiti1994(JF262782.1)   | GTT (3481-3483) | V |
|              | Senegal1981(MF004387.1) | GTT (3481-3483) | V |
| <b>#1166</b> | Manatee(MN192436)       | CTT (3496-3498) | L |
|              | Haiti2014(KT276273.1)   | TTT (3496-3498) | F |
|              | Haiti2014(KP140942.1)   | CTT (3496-3498) | L |
|              | Haiti2015(MK514144.1)   | CTT (3496-3498) | L |
|              | Haiti1994(JF262782.1)   | TTT (3496-3498) | F |
|              | Senegal1981(MF004387.1) | CTT (3496-3498) | L |
| <b>#1194</b> | Manatee(MN192436)       | ATG (3580-3582) | M |
|              | Haiti2014(KT276273.1)   | ATA (3580-3582) | I |
|              | Haiti2014(KP140942.1)   | ATG (3580-3582) | M |
|              | Haiti2015(MK514144.1)   | ATA (3580-3582) | I |
|              | Haiti1994(JF262782.1)   | ATA (3580-3582) | I |
|              | Senegal1981(MF004387.1) | ATA (3580-3582) | I |
| <b>#1198</b> | Manatee(MN192436)       | ACC (3592-3594) | T |
|              | Haiti2014(KT276273.1)   | ATC (3592-3594) | I |
|              | Haiti2014(KP140942.1)   | ACC (3592-3594) | T |
|              | Haiti2015(MK514144.1)   | ACC (3592-3594) | T |
|              | Haiti1994(JF262782.1)   | ATC (3592-3594) | I |
|              | Senegal1981(MF004387.1) | ATC (3592-3594) | I |
| <b>#1238</b> | Manatee(MN192436)       | ACA (3712-3714) | T |
|              | Haiti2014(KT276273.1)   | GTA (3712-3714) | V |
|              | Haiti2014(KP140942.1)   | ACA (3712-3714) | T |
|              | Haiti2015(MK514144.1)   | ACA (3712-3714) | T |
|              | Haiti1994(JF262782.1)   | GTA (3712-3714) | V |
|              | Senegal1981(MF004387.1) | GTG (3712-3714) | V |
| <b>#1243</b> | Manatee(MN192436)       | CAT (3727-3729) | H |
|              | Haiti2014(KT276273.1)   | TAT (3727-3729) | Y |
|              | Haiti2014(KP140942.1)   | CAT (3727-3729) | H |
|              | Haiti2015(MK514144.1)   | CAT (3727-3729) | H |
|              | Haiti1994(JF262782.1)   | TAT (3727-3729) | Y |
|              | Senegal1981(MF004387.1) | CAT (3727-3729) | H |
| <b>#1285</b> | Manatee(MN192436)       | TCA (3853-3855) | S |
|              | Haiti2014(KT276273.1)   | CCA (3853-3855) | P |
|              | Haiti2014(KP140942.1)   | TCA (3853-3855) | S |
|              | Haiti2015(MK514144.1)   | TCA (3853-3855) | S |
|              | Haiti1994(JF262782.1)   | CCA (3853-3855) | P |
|              | Senegal1981(MF004387.1) | CCA (3853-3855) | P |

|              |                         |                 |   |
|--------------|-------------------------|-----------------|---|
| <b>#1287</b> | Manatee(MN192436)       | GTC (3859-3861) | V |
|              | Haiti2014(KT276273.1)   | GTC (3859-3861) | V |
|              | Haiti2014(KP140942.1)   | GTC (3859-3861) | V |
|              | Haiti2015(MK514144.1)   | GTC (3859-3861) | V |
|              | Haiti1994(JF262782.1)   | GTC (3859-3861) | V |
|              | Senegal1981(MF004387.1) | ATC (3859-3861) | I |
| <b>#1295</b> | Manatee(MN192436)       | ACT (3883-3885) | T |
|              | Haiti2014(KT276273.1)   | GCT (3883-3885) | A |
|              | Haiti2014(KP140942.1)   | GCT (3883-3885) | A |
|              | Haiti2015(MK514144.1)   | GCT (3883-3885) | A |
|              | Haiti1994(JF262782.1)   | GCT (3883-3885) | A |
|              | Senegal1981(MF004387.1) | GCT (3883-3885) | A |
| <b>#1343</b> | Manatee(MN192436)       | AAA (4027-4029) | K |
|              | Haiti2014(KT276273.1)   | AGA (4027-4029) | R |
|              | Haiti2014(KP140942.1)   | AAA (4027-4029) | K |
|              | Haiti2015(MK514144.1)   | AGA (4027-4029) | R |
|              | Haiti1994(JF262782.1)   | AGA (4027-4029) | R |
|              | Senegal1981(MF004387.1) | AGA (4027-4029) | R |
| <b>NS2B</b>  |                         |                 |   |
| <b>#1460</b> | Manatee(MN192436)       | GTC (4378-4380) | V |
|              | Haiti2014(KT276273.1)   | GTC (4378-4380) | V |
|              | Haiti2014(KP140942.1)   | GTC (4378-4380) | V |
|              | Haiti2015(MK514144.1)   | ATC (4378-4380) | I |
|              | Haiti1994(JF262782.1)   | ATC (4378-4380) | I |
|              | Senegal1981(MF004387.1) | GTC (4378-4380) | V |
| <b>NS3</b>   |                         |                 |   |
| <b>#1636</b> | Manatee(MN192436)       | GTT (4906-4908) | V |
|              | Haiti2014(KT276273.1)   | GTT (4906-4908) | V |
|              | Haiti2014(KP140942.1)   | GTT (4906-4908) | V |
|              | Haiti2015(MK514144.1)   | ATC (4906-4908) | I |
|              | Haiti1994(JF262782.1)   | GTT (4906-4908) | V |
|              | Senegal1981(MF004387.1) | GTC (4906-4908) | V |
| <b>#1939</b> | Manatee(MN192436)       | CCA (5815-5817) | P |
|              | Haiti2014(KT276273.1)   | CCA (5815-5817) | P |
|              | Haiti2014(KP140942.1)   | CCA (5815-5817) | P |
|              | Haiti2015(MK514144.1)   | CCA (5815-5817) | P |
|              | Haiti1994(JF262782.1)   | CTA (5815-5817) | L |
|              | Senegal1981(MF004387.1) | CCA (5815-5817) | P |
| <b>#2068</b> | Manatee(MN192436)       | AGA (6202-6204) | R |
|              | Haiti2014(KT276273.1)   | AGA (6202-6204) | R |
|              | Haiti2014(KP140942.1)   | AGA (6202-6204) | R |
|              | Haiti2015(MK514144.1)   | AAA (6202-6204) | K |
|              | Haiti1994(JF262782.1)   | AGA (6202-6204) | R |
|              | Senegal1981(MF004387.1) | AGA (6202-6204) | R |
| <b>NS4A</b>  |                         |                 |   |
| <b>#2094</b> | Manatee(MN192436)       | TTG (6280-6282) | L |
|              | Haiti2014(KT276273.1)   | ATT (6280-6282) | I |
|              | Haiti2014(KP140942.1)   | TTG (6280-6282) | L |
|              | Haiti2015(MK514144.1)   | ATA (6280-6282) | I |
|              | Haiti1994(JF262782.1)   | ATA (6280-6282) | I |
|              | Senegal1981(MF004387.1) | ATA (6280-6282) | I |

|              |                         |                 |   |
|--------------|-------------------------|-----------------|---|
| <b>#2179</b> | Manatee(MN192436)       | ACC (6535-6537) | T |
|              | Haiti2014(KT276273.1)   | ACC (6535-6537) | T |
|              | Haiti2014(KP140942.1)   | ACC (6535-6537) | T |
|              | Haiti2015(MK514144.1)   | ACC (6535-6537) | T |
|              | Haiti1994(JF262782.1)   | ACC (6535-6537) | T |
|              | Senegal1981(MF004387.1) | ATC (6535-6537) | I |
| <b>#2189</b> | Manatee(MN192436)       | GTA (6565-6567) | V |
|              | Haiti2014(KT276273.1)   | GTA (6565-6567) | V |
|              | Haiti2014(KP140942.1)   | GTA (6565-6567) | V |
|              | Haiti2015(MK514144.1)   | GTA (6565-6567) | V |
|              | Haiti1994(JF262782.1)   | ATA (6565-6567) | I |
|              | Senegal1981(MF004387.1) | GTA (6565-6567) | V |
| <b>2K</b>    |                         |                 |   |
| <b>#2232</b> | Manatee(MN192436)       | GCC (6694-6696) | A |
|              | Haiti2014(KT276273.1)   | ACC (6694-6696) | T |
|              | Haiti2014(KP140942.1)   | ACC (6694-6696) | T |
|              | Haiti2015(MK514144.1)   | ACC (6694-6696) | T |
|              | Haiti1994(JF262782.1)   | ACC (6694-6696) | T |
|              | Senegal1981(MF004387.1) | ACC (6694-6696) | T |
| <b>NS4B</b>  |                         |                 |   |
| <b>#2347</b> | Manatee(MN192436)       | ATA (7039-7041) | I |
|              | Haiti2014(KT276273.1)   | ACA (7039-7041) | T |
|              | Haiti2014(KP140942.1)   | ACA (7039-7041) | T |
|              | Haiti2015(MK514144.1)   | ACA (7039-7041) | T |
|              | Haiti1994(JF262782.1)   | ACA (7039-7041) | T |
|              | Senegal1981(MF004387.1) | ACA (7039-7041) | T |
| <b>#2354</b> | Manatee(MN192436)       | TTA (7060-7062) | L |
|              | Haiti2014(KT276273.1)   | TTA (7060-7062) | L |
|              | Haiti2014(KP140942.1)   | TTA (7060-7062) | L |
|              | Haiti2015(MK514144.1)   | CTA (7060-7062) | L |
|              | Haiti1994(JF262782.1)   | TYA (7060-7062) | - |
|              | Senegal1981(MF004387.1) | TCA (7060-7062) | S |
| <b>NS5</b>   |                         |                 |   |
| <b>#2492</b> | Manatee(MN192436)       | ACA (7474-7476) | T |
|              | Haiti2014(KT276273.1)   | ACA (7474-7476) | T |
|              | Haiti2014(KP140942.1)   | ACA (7474-7476) | T |
|              | Haiti2015(MK514144.1)   | GCA (7474-7476) | A |
|              | Haiti1994(JF262782.1)   | ACA (7474-7476) | T |
|              | Senegal1981(MF004387.1) | ACA (7474-7476) | T |
| <b>#2651</b> | Manatee(MN192436)       | GTT (7951-7953) | V |
|              | Haiti2014(KT276273.1)   | GTT (7951-7953) | V |
|              | Haiti2014(KP140942.1)   | GTT (7951-7953) | V |
|              | Haiti2015(MK514144.1)   | GTT (7951-7953) | V |
|              | Haiti1994(JF262782.1)   | ATT (7951-7953) | I |
|              | Senegal1981(MF004387.1) | GTT (7951-7953) | V |
| <b>#2883</b> | Manatee(MN192436)       | AAG (8647-8649) | K |
|              | Haiti2014(KT276273.1)   | AAG (8647-8649) | K |
|              | Haiti2014(KP140942.1)   | AAG (8647-8649) | K |
|              | Haiti2015(MK514144.1)   | AGG (8647-8649) | R |
|              | Haiti1994(JF262782.1)   | AAG (8647-8649) | K |
|              | Senegal1981(MF004387.1) | AGG (8647-8649) | R |

|              |                         |                 |   |
|--------------|-------------------------|-----------------|---|
| <b>#2892</b> | Manatee(MN192436)       | GCA (8674-8676) | A |
|              | Haiti2014(KT276273.1)   | GCA (8674-8676) | A |
|              | Haiti2014(KP140942.1)   | GCA (8674-8676) | A |
|              | Haiti2015(MK514144.1)   | TCA (8674-8676) | S |
|              | Haiti1994(JF262782.1)   | TCA (8674-8676) | S |
|              | Senegal1981(MF004387.1) | TCA (8674-8676) | S |
| <b>#2924</b> | Manatee(MN192436)       | AAA (8770-8772) | K |
|              | Haiti2014(KT276273.1)   | AAA (8770-8772) | K |
|              | Haiti2014(KP140942.1)   | AAA (8770-8772) | K |
|              | Haiti2015(MK514144.1)   | AAA (8770-8772) | K |
|              | Haiti1994(JF262782.1)   | AGA (8770-8772) | R |
|              | Senegal1981(MF004387.1) | AAA (8770-8772) | K |
| <b>#2991</b> | Manatee(MN192436)       | TTG (8971-8973) | L |
|              | Haiti2014(KT276273.1)   | TGG (8971-8973) | W |
|              | Haiti2014(KP140942.1)   | TGG (8971-8973) | W |
|              | Haiti2015(MK514144.1)   | TGG (8971-8973) | W |
|              | Haiti1994(JF262782.1)   | TGG (8971-8973) | W |
|              | Senegal1981(MF004387.1) | TGG (8971-8973) | W |
| <b>#3073</b> | Manatee(MN192436)       | AGA (9217-9219) | R |
|              | Haiti2014(KT276273.1)   | AGA (9217-9219) | R |
|              | Haiti2014(KP140942.1)   | AGA (9217-9219) | R |
|              | Haiti2015(MK514144.1)   | AGA (9217-9219) | R |
|              | Haiti1994(JF262782.1)   | AAA (9217-9219) | K |
|              | Senegal1981(MF004387.1) | AGA (9217-9219) | R |
| <b>#3136</b> | Manatee(MN192436)       | AGA (9406-9408) | R |
|              | Haiti2014(KT276273.1)   | AGA (9406-9408) | R |
|              | Haiti2014(KP140942.1)   | AGA (9406-9408) | R |
|              | Haiti2015(MK514144.1)   | AGA (9406-9408) | R |
|              | Haiti1994(JF262782.1)   | AGA (9406-9408) | R |
|              | Senegal1981(MF004387.1) | AAA (9406-9408) | K |
| <b>#3163</b> | Manatee(MN192436)       | GCC (9487-9489) | A |
|              | Haiti2014(KT276273.1)   | GCC (9487-9489) | A |
|              | Haiti2014(KP140942.1)   | GCC (9487-9489) | A |
|              | Haiti2015(MK514144.1)   | GGC (9487-9489) | G |
|              | Haiti1994(JF262782.1)   | GGC (9487-9489) | G |
|              | Senegal1981(MF004387.1) | GGC (9487-9489) | G |
| <b>#3237</b> | Manatee(MN192436)       | AGA (9709-9711) | R |
|              | Haiti2014(KT276273.1)   | AAA (9709-9711) | K |
|              | Haiti2014(KP140942.1)   | AAA (9709-9711) | K |
|              | Haiti2015(MK514144.1)   | AGG (9709-9711) | R |
|              | Haiti1994(JF262782.1)   | AGA (9709-9711) | R |
|              | Senegal1981(MF004387.1) | AGA (9709-9711) | R |
| <b>#3243</b> | Manatee(MN192436)       | GCC (9727-9729) | A |
|              | Haiti2014(KT276273.1)   | GCC (9727-9729) | A |
|              | Haiti2014(KP140942.1)   | GCC (9727-9729) | A |
|              | Haiti2015(MK514144.1)   | GGC (9727-9729) | G |
|              | Haiti1994(JF262782.1)   | GGC (9727-9729) | G |
|              | Senegal1981(MF004387.1) | GGC (9727-9729) | G |
| <b>#3313</b> | Manatee(MN192436)       | ATT (9937-9939) | I |
|              | Haiti2014(KT276273.1)   | ATT (9937-9939) | I |
|              | Haiti2014(KP140942.1)   | ATT (9937-9939) | I |

|              |                         |                   |   |
|--------------|-------------------------|-------------------|---|
|              | Haiti2015(MK514144.1)   | ATT (9937-9939)   | I |
|              | Haiti1994(JF262782.1)   | ACT (9937-9939)   | T |
|              | Senegal1981(MF004387.1) | ACT (9937-9939)   | T |
| <b>#3368</b> | Manatee(MN192436)       | ATG (10102-10104) | M |
|              | Haiti2014(KT276273.1)   | ATG (10102-10104) | M |
|              | Haiti2014(KP140942.1)   | ATG (10102-10104) | M |
|              | Haiti2015(MK514144.1)   | GTG (10102-10104) | V |
|              | Haiti1994(JF262782.1)   | GTG (10102-10104) | V |
|              | Senegal1981(MF004387.1) | GTG (10102-10104) | V |
| <b>#3375</b> | Manatee(MN192436)       | AGA (10123-10125) | R |
|              | Haiti2014(KT276273.1)   | AGA (10123-10125) | R |
|              | Haiti2014(KP140942.1)   | AGA (10123-10125) | R |
|              | Haiti2015(MK514144.1)   | AAA (10123-10125) | K |
|              | Haiti1994(JF262782.1)   | AAA (10123-10125) | K |
|              | Senegal1981(MF004387.1) | AAA (10123-10125) | K |

Codon nucleotide numbers (nuc. #) marked by their positions on the genomes from the first nucleotide of the Capsid gene to the last nucleotide of the NS5 gene. Amino acid position numbers (aa#) are numbered in the same way in the amino acid sequence.
