# Supplementary material
Source: PubMed Central journal article supplement (PMC7193045)

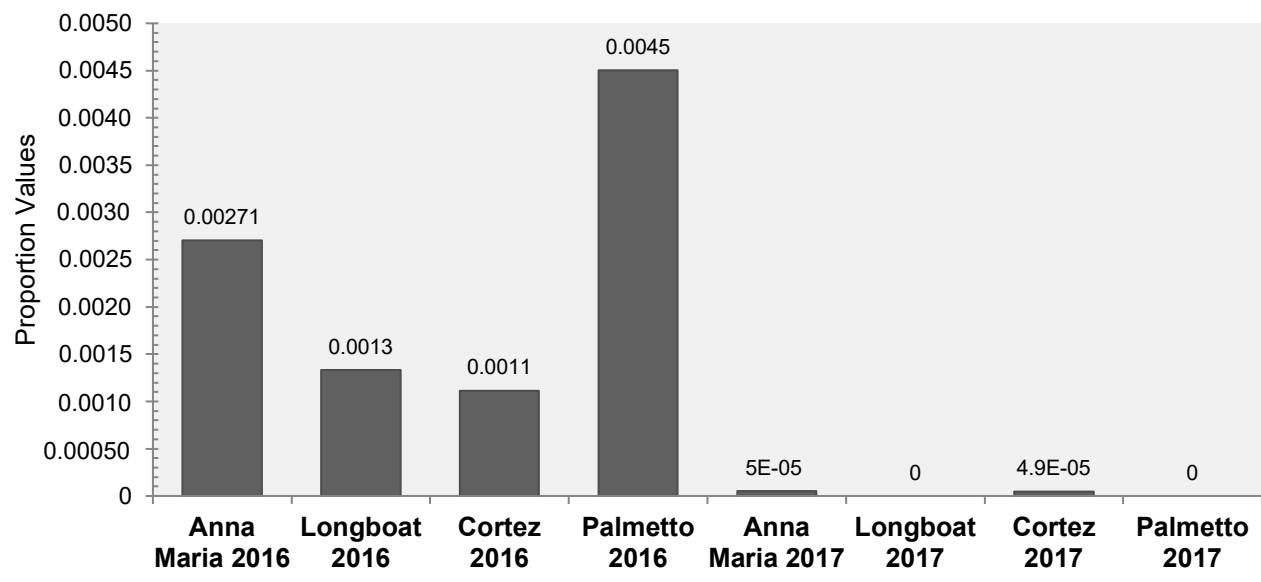

Supplement: mSphere.00316-20-sf001.pdf [file mSphere.00316-20-sf001.pdf]

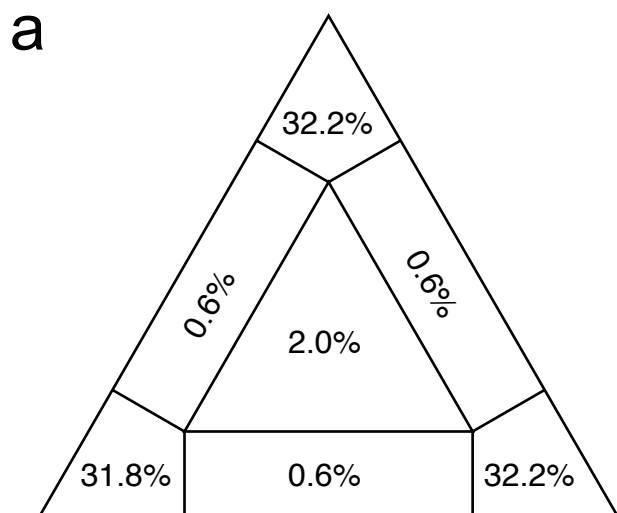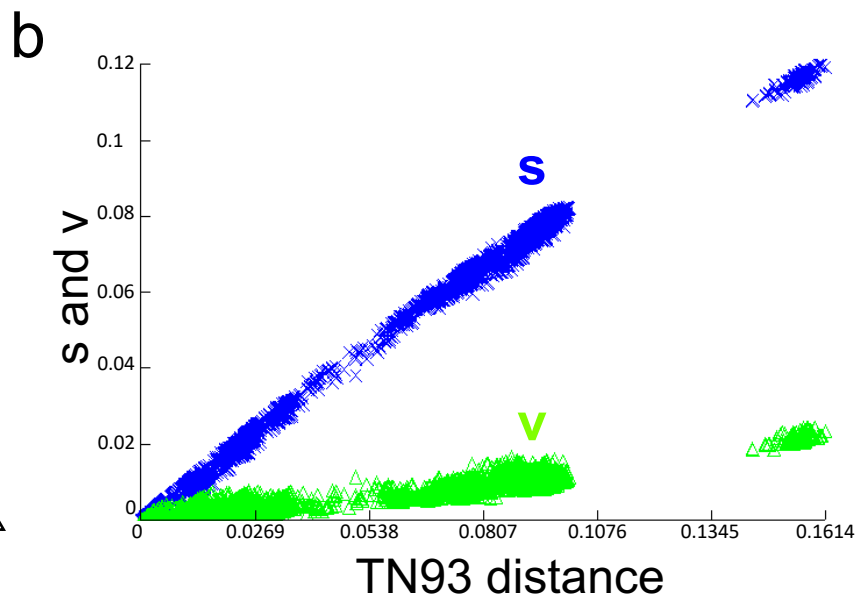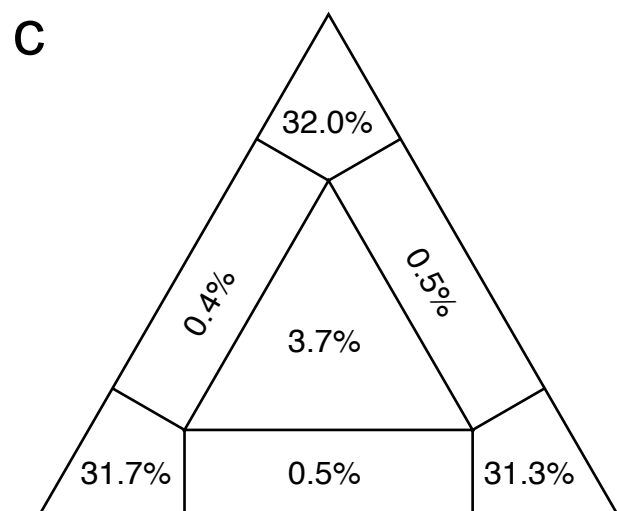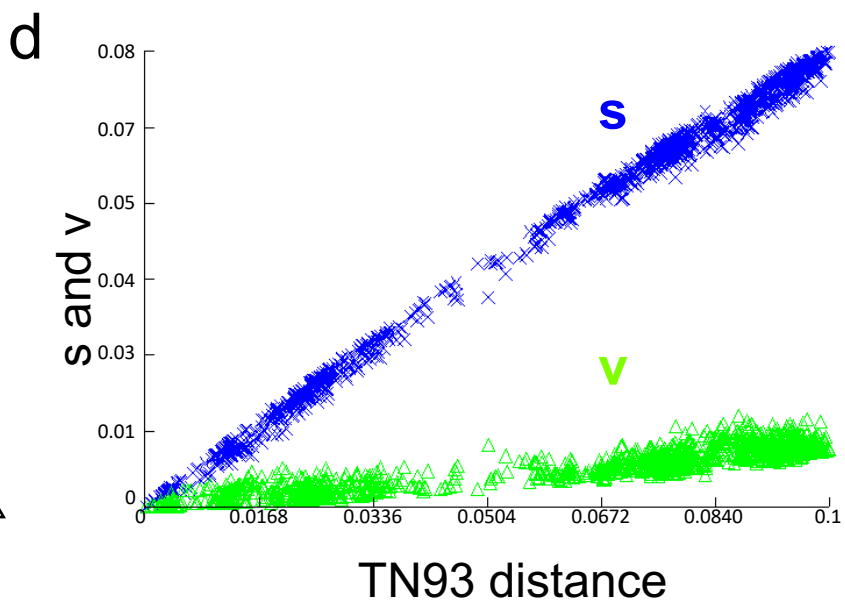

Supplement: mSphere.00316-20-sf002.pdf [file mSphere.00316-20-sf002.pdf]

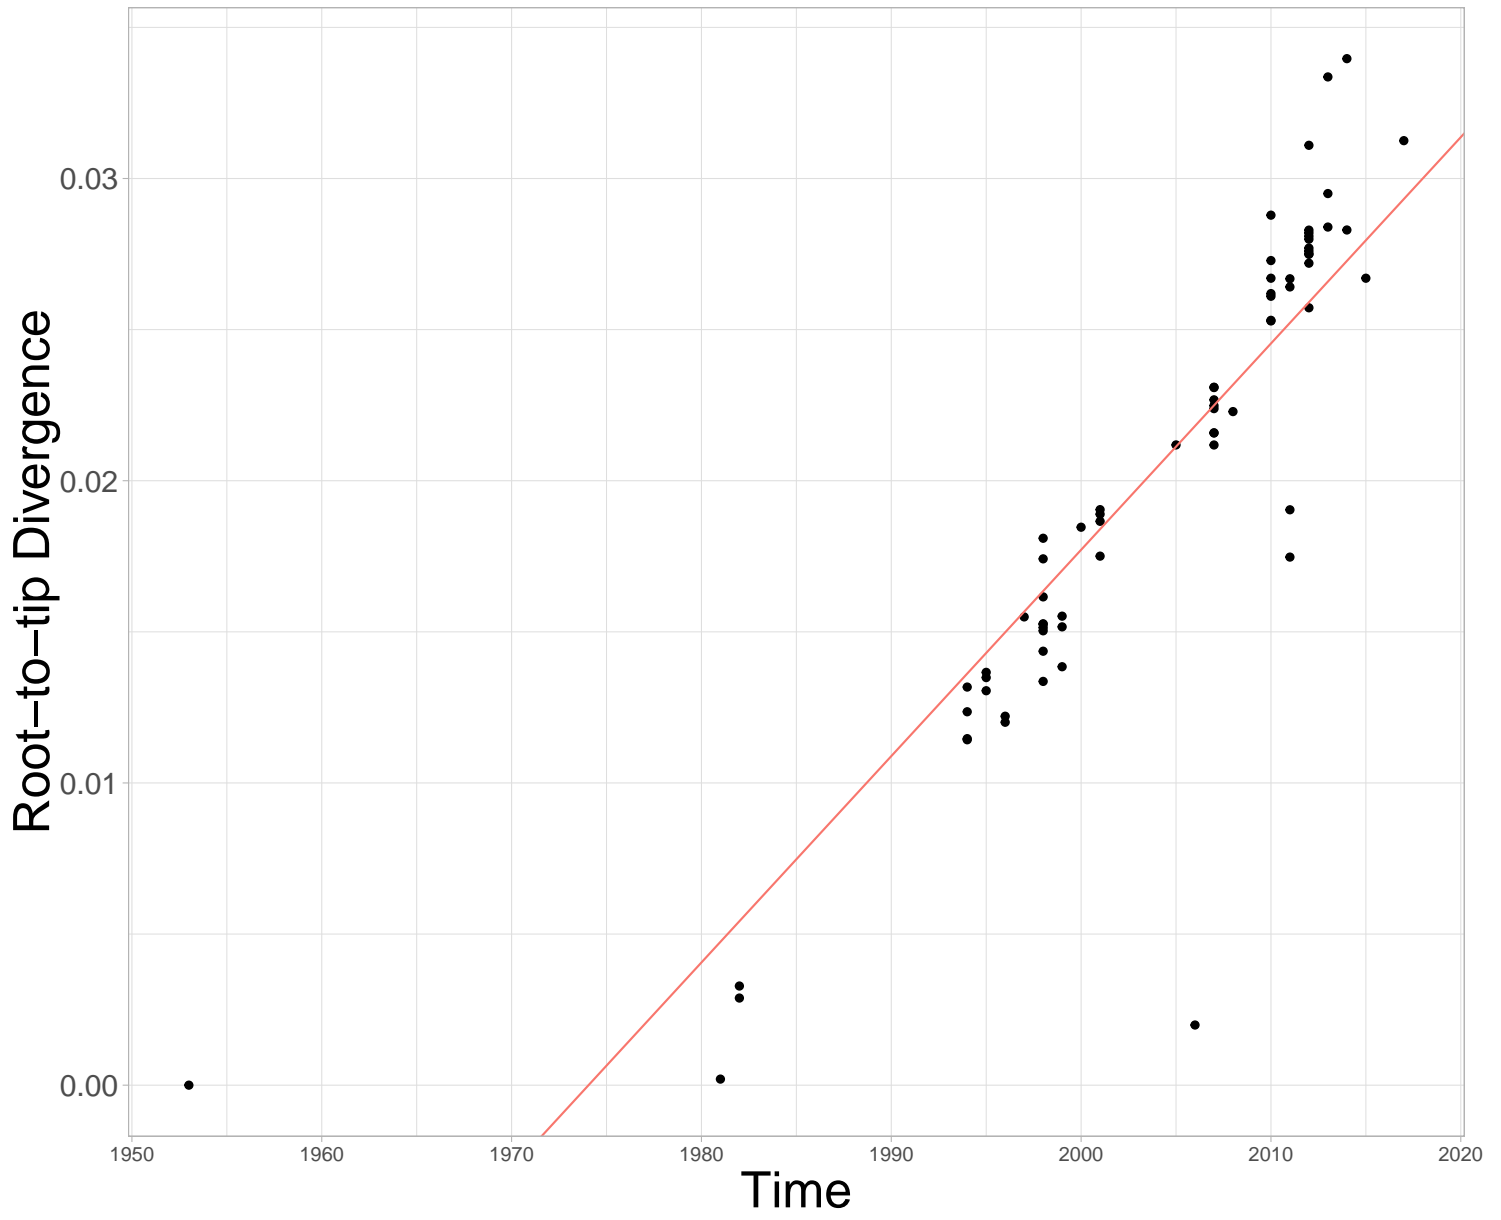

Supplement: mSphere.00316-20-sf003.pdf [file mSphere.00316-20-sf003.pdf]

a

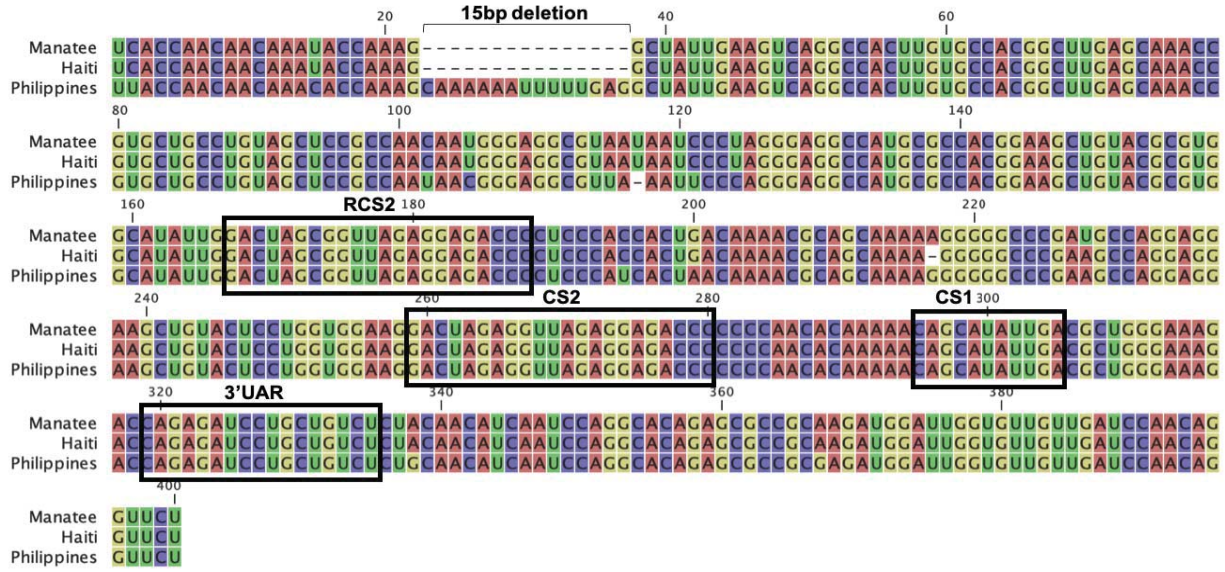

b

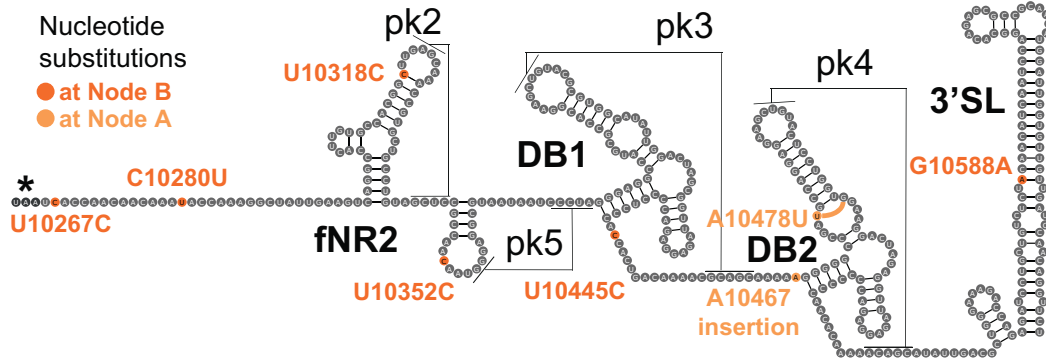

Supplement: mSphere.00316-20-sf004.pdf [file mSphere.00316-20-sf004.pdf]
